# Supplementary material for: Spatial-fluxomics provides a subcellular-compartmentalized view of reductive glutamine metabolism in cancer cells
Source: PubMed Central journal article supplement (PMC6430770; doi:10.1038/s41467-019-09352-1), 2019-03-22
Supplement: 41467_2019_9352_MOESM3_ESM.pdf [file 41467_2019_9352_MOESM3_ESM.pdf]

## **Description of Additional Supplementary Files**

File Name: Supplementary Data 1

Description: Relative metabolite pool sizes in mitochondria and cytosol.

File Name: Supplementary Data 2

Description: Absolute metabolite pool sizes in mitochondria and cytosol.

File Name: Supplementary Data 3

Description: Mass-isotopomer distribution of metabolites in mitochondrial and cytosolic fraction under normoxia.

File Name: Supplementary Data 4

Description: Mass-isotopomer distribution of metabolites in mitochondrial and cytosolic fraction under hypoxia.

File Name: Supplementary Data 5

Description: Mass-isotopomer distribution of metabolites in mitochondrial and cytosolic fraction of SDH-WT cells.

File Name: Supplementary Data 6

Description: Mass-isotopomer distribution of metabolites in mitochondrial and cytosolic fraction of SDH-KO cells.

File Name: Supplementary Data 7

Description: Mass-isotopomer distributions of metabolites in mitochondrial and cytosolic fraction given physiological concentration of glutamine (0.5 mM).

File Name: Supplementary Data 8

Description: Inferred fluxes.
